# Supplementary material for: Adherence to surveillance guidelines after removal of colorectal adenomas: a large, community-based study
Source: PubMed Central journal article supplement — Gut. 2015 Jan 13;64(10):1584–92. doi: 10.1136/gutjnl-2013-306453 (PMC4602240; doi:10.1136/gutjnl-2013-306453), 2015-01-13
Supplement: gutjnl-2013-306453-s1.pdf [file gutjnl-2013-306453-s1.pdf]

**Appendix 1.** Yield of non-advanced adenoma (NAA) at surveillance endoscopy according to number of adenomas at index colonoscopy and timing of surveillance according to the guidelines (n = 1,904)

| Period of index colonoscopy | Recommended interval | NAA, % (n/ n total)  |                          |                       |                       |
|-----------------------------|----------------------|----------------------|--------------------------|-----------------------|-----------------------|
|                             |                      | Too early            | Appropriate <sup>a</sup> | Delayed               | Total                 |
| <i>June 1998 - 2001</i>     |                      |                      |                          |                       |                       |
| 1 adenoma                   | 2-3 year             | 17% (68/389)         | 21% (81/384)             | 21% (63/298)          | 20% (212/1071)        |
| 2 adenomas                  | 1 year               | 25% (4/16)           | 23% (21/90)              | 28% (45/159)          | 26% (70/265)          |
| 3+ adenomas                 | 1 year               | 29% (4/14)           | 31% (21/68)              | 28% (25/89)           | 29% (50/171)          |
| <i>Overall</i>              |                      | <i>18% (76/419)</i>  | <i>23% (123/542)</i>     | <i>24% (133/546)</i>  | <i>22% (332/1507)</i> |
| <i>In 2002</i>              |                      |                      |                          |                       |                       |
| 1 adenoma                   | 6 year               | 16% (31/193)         | 18% (5/28)               | 0% (0/3)              | 16% (36/224)          |
| 2 adenomas                  | 6 year               | 27% (23/86)          | 17% (2/12)               | -                     | 26% (25/98)           |
| 3+ adenomas                 | 3 year               | 27% (12/44)          | 45% (9/20)               | 36% (5/11)            | 35% (26/75)           |
| <i>Overall</i>              |                      | <i>20% (66/323)</i>  | <i>27% (16/60)</i>       | <i>36% (5/14)</i>     | <i>22% (87/397)</i>   |
| <i>Total</i>                |                      | <i>19% (142/742)</i> | <i>23% (139/602)</i>     | <i>25% (138/560)*</i> | <i>22% (419/1904)</i> |

NAA includes adenomas with size smaller than 10 mm at pathology or endoscopy, tubular or tubulovillous histology and low-grade dysplasia

<sup>a</sup> Appropriate interval, before 2002: 1-year plus or minus 3 months, 2-3 years plus or minus 6 months; and in 2002: 3- or 6-years plus or minus 6 months\*

\* Significant at level  $P < 0.05$

**Appendix 2.** Sub analyses: comparison (*P* values) of Kaplan-Meier probability curves for surveillance colonoscopy use by month from index colonoscopy between various subgroups

| <b>Period of index colonoscopy</b> | <b>Five hospitals with data over complete period versus the other hospitals</b> | <b>June 1998 - Oct 2000 vs. transitional phase (Oct 2000 – Dec 2001)</b> | <b>1<sup>st</sup> half vs. 2<sup>nd</sup> half of 2002</b> | <b>Academic vs. non-academic hospital</b> | <b>Active vs. passive follow-up system</b> |
|------------------------------------|---------------------------------------------------------------------------------|--------------------------------------------------------------------------|------------------------------------------------------------|-------------------------------------------|--------------------------------------------|
| <i>June 1998 - 2001</i>            |                                                                                 |                                                                          |                                                            |                                           |                                            |
| 1 adenoma                          | <i>P</i> = 0.86                                                                 | <i>P</i> < 0.01                                                          | n.a.                                                       | <i>P</i> < 0.01                           | <i>P</i> = 0.77                            |
| 2 adenomas                         | <i>P</i> = 0.52                                                                 | <i>P</i> = 0.17                                                          | n.a.                                                       | <i>P</i> = 0.03                           | <i>P</i> = 0.52                            |
| 3+ adenomas                        | <i>P</i> = 0.10                                                                 | <i>P</i> = 0.63                                                          | n.a.                                                       | <i>P</i> = 0.63                           | <i>P</i> = 0.03                            |
| <i>Overall</i>                     | <i>P</i> = 0.55                                                                 | <i>P</i> < 0.01                                                          | <i>n.a.</i>                                                | <i>P</i> < 0.01                           | <i>P</i> = 0.34                            |
| <i>2002</i>                        |                                                                                 |                                                                          |                                                            |                                           |                                            |
| 1 adenoma                          | <i>P</i> = 0.95                                                                 | n.a.                                                                     | <i>P</i> = 0.34                                            | <i>P</i> = 0.85                           | <i>P</i> = 0.46                            |
| 2 adenomas                         | <i>P</i> = 0.68                                                                 | n.a.                                                                     | <i>P</i> = 0.41                                            | <i>P</i> = 0.54                           | <i>P</i> = 0.05                            |
| 3+ adenomas                        | <i>P</i> = 1.00                                                                 | n.a.                                                                     | <i>P</i> = 0.62                                            | <i>P</i> = 0.33                           | <i>P</i> = 0.04                            |
| <i>Overall</i>                     | <i>P</i> = 0.67                                                                 | <i>n.a.</i>                                                              | <i>P</i> = 0.41                                            | <i>P</i> = 0.92                           | <i>P</i> < 0.01                            |
